# Supplementary material
Source: publisher figshare collection journal article supplement (https://tandf.figshare.com/ndownloader/files/18112376)
Supplement: Supplementary file 1 [file 18112376]

Archive with 3 entries (3 files):
- UASA_A_1528978_Supplement/Code.zip
- UASA_A_1528978_Supplement/JASA-ACS-author-formCalConcordanceBlind_Chen.pdf
- UASA_A_1528978_Supplement/UASA_A_1528978_Supplement.pdf
